# Supplementary material
Source: Springer Nature journal article supplement (https://www.springermedizin.de/resource/supplementary/13013_2011_427_MOESM4_ESM.pdf/9631850)

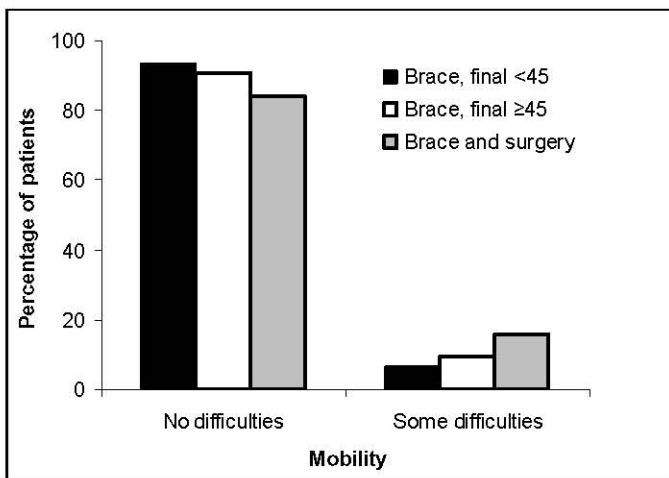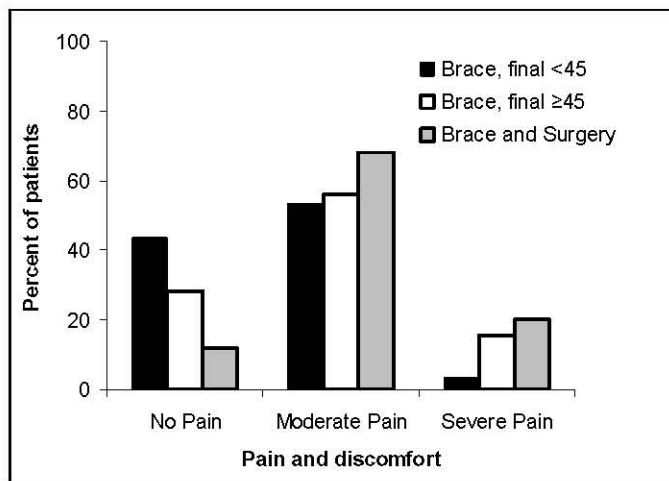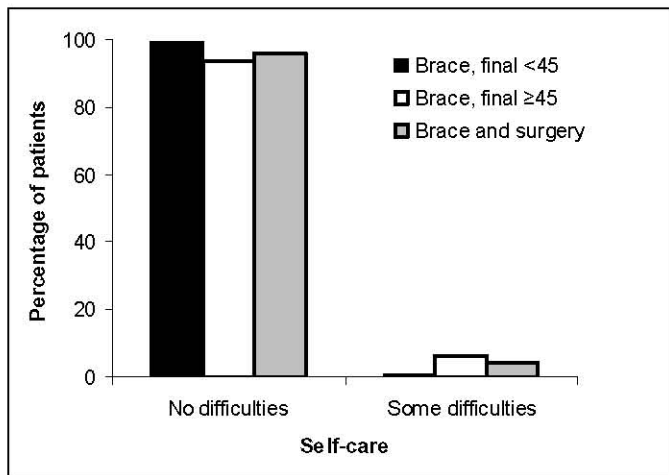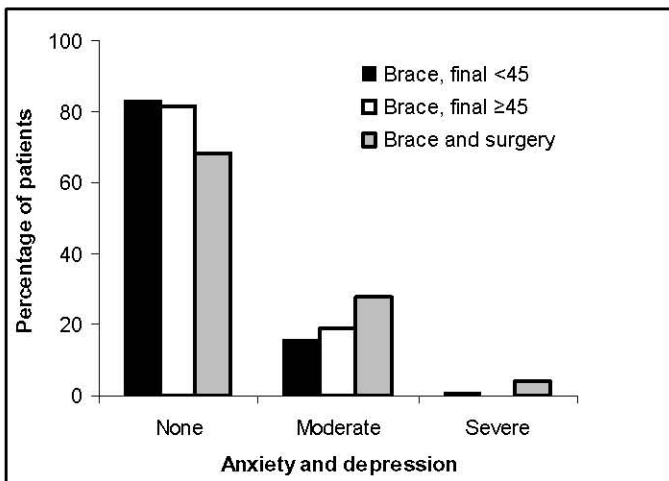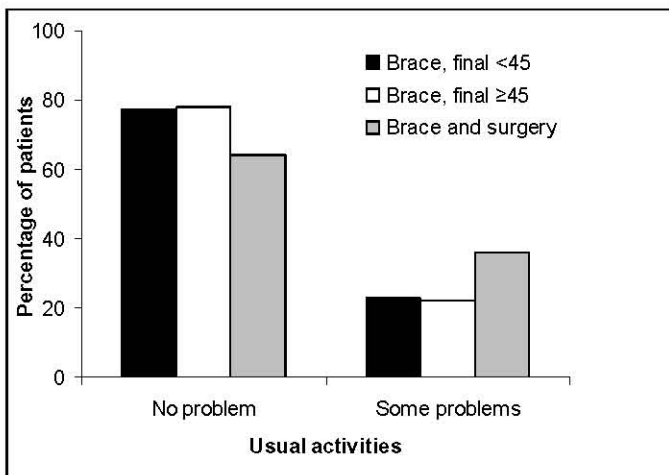

Supplement: MOESM4 [file 9631850]
